# Supplementary material for: The Impact of Time Interval between Hepatic Resection and Liver Transplantation on Clinical Outcome in Patients with Hepatocellular Carcinoma
Source: Cancers (Basel). 2021 May 15;13(10):2398. doi: 10.3390/cancers13102398 (PMC8156967; doi:10.3390/cancers13102398)
Supplement: Supplementary file 1 [file cancers-13-02398-s001.zip › cancers-1204085-supplementary.pdf]

Supplementary

# The Impact of Time Interval between Hepatic Resection and Liver Transplantation on Clinical Outcome in Patients with Hepatocellular Carcinoma

Matteo Serenari et. al.

Figure S1. Flow-chart of the study.

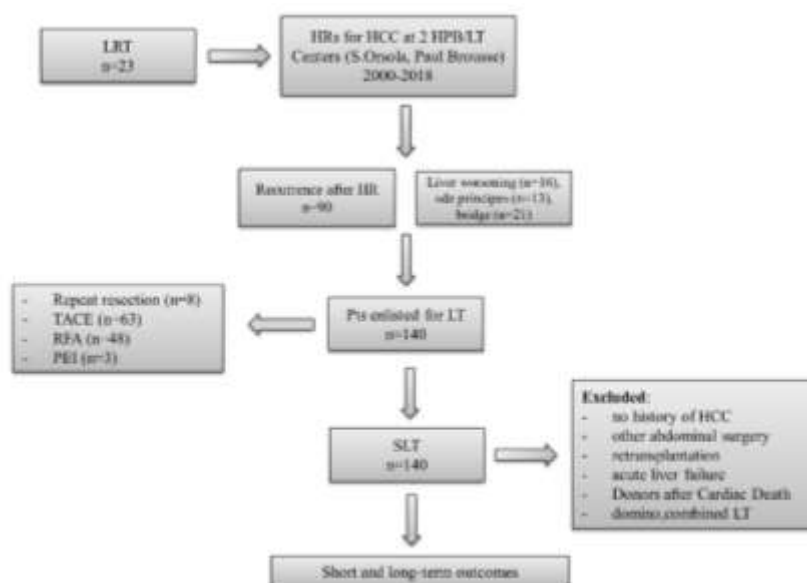

LRT = locoregional treatment; HR = hepatic resection; HCC= hepatocellular carcinoma; HPB= hepato-biliary; LT= liver transplantation; SLT= secondary liver transplantation; TACE = transarterial chemoembolization; RFA = radiofrequency ablation; PEI = percutaneous ethanol injection.

Table S1. Comparison between benchmark cutoffs for liver transplantation (LT) and the outcomes after secondary LT.

|                                   | BENCHMARK    | SLT     |
|-----------------------------------|--------------|---------|
| <b>Perioperative Course</b>       |              |         |
| OP duration                       | ≤6 h         | 8 h     |
| Intraoperative blood transfusions | ≤900 cc (3U) | 889 cc  |
| ICU stay                          | ≤4 days      | 5 days  |
| Hospital stay                     | ≤18 days     | 16 days |
| <b>Morbidity and Mortality</b>    |              |         |
| Clavien ≥ IIIA morbidity          | ≤42%         | 35%     |
| Biliary complications             | ≤12%         | 10%     |
| Hepatic artery thrombosis         | ≤4.1%        | 0.7%    |
| CCI                               | ≤29.6        | 20.9    |
| Graft-loss                        | ≤4%          | 3.6%    |
| Mortality                         | ≤2%          | 1.4%    |

OP = operation; SLT = secondary liver transplantation; ICU = intensive care unit; CCI = Comprehensive Complication Index.
